# Supplementary material for: Nutrient-responsive regulation determines biodiversity in a colicin-mediated bacterial community
Source: PubMed Central journal article supplement (PMC4161892; doi:10.1186/s12915-014-0068-2), 2014-08-27
Supplement: 12915_2014_68_MOESM1_ESM.pdf [file 12915_2014_68_MOESM1_ESM.pdf]

time

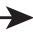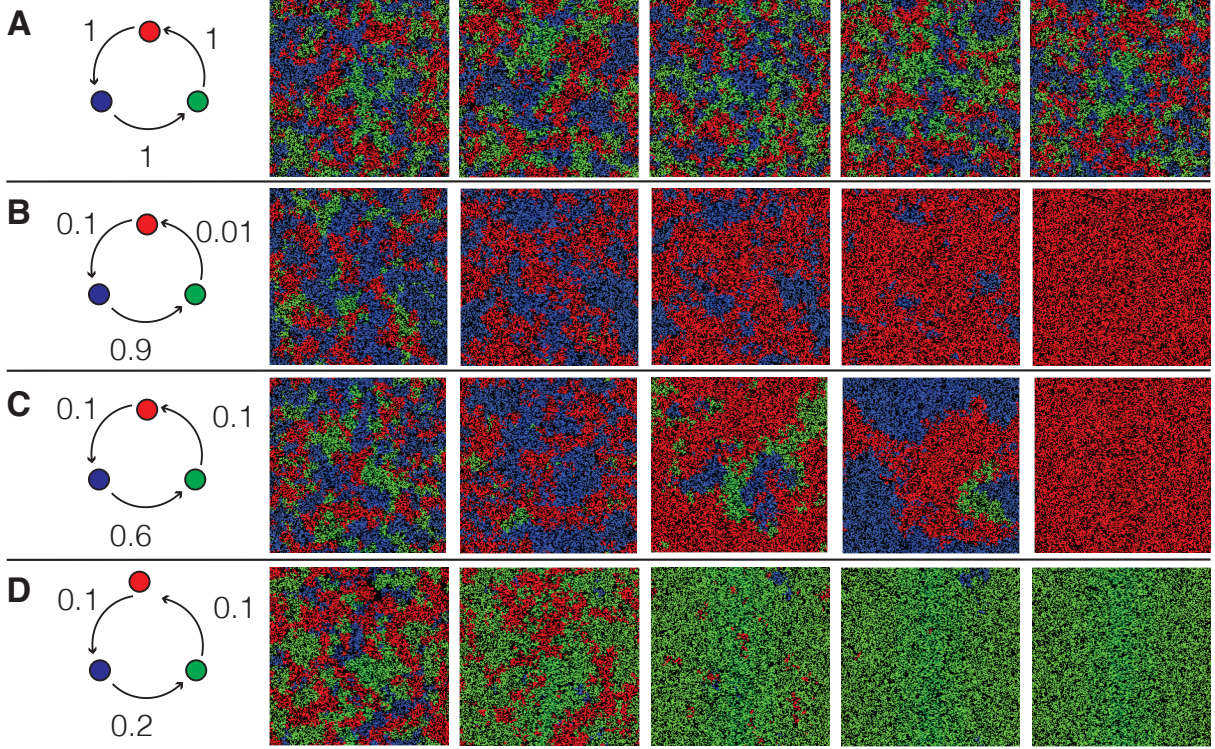

Three contact processes representing each species spread on the lattice with birth rates  $\beta_{R,P,S} = 1$  and die with rates  $m_{R,P,S}$ . The three species play a rock-paper-scissor game upon encounters. The simulation proceeds iteratively as follows: pick a random (focal) site ( $x$ ) and pick a random neighbor ( $y$ ) out of the four neighbors of the focal site. If both the focal site and the neighbor are vacant, nothing happens; if the focal site is vacant and the neighbor is occupied, the respective neighbor replicates into the focal site with probability one. Thus,  $\emptyset_x + R_y \rightarrow R_x + R_y$ ,  $\emptyset_x + P_y \rightarrow P_x + P_y$ , and  $\emptyset_x + S_y \rightarrow S_x + S_y$ . In case the focal site is occupied, it has a probability of dying equal to  $m_R$ ,  $m_P$ , or  $m_S$  when occupied by R, P, or S, respectively. Thus,  $R_x \xrightarrow{m_R} \emptyset_x$ ,  $P_x \xrightarrow{m_P} \emptyset_x$ , and  $S_x \xrightarrow{m_S} \emptyset_x$ . If the particle does not die, it interacts with a random neighbor following a cyclical competitive hierarchy defined by the rock-paper-scissor game: Rock takes over Scissor with probability  $\sigma_R$ :  $S_x + R_y \xrightarrow{\sigma_R} R_x + R_y$ , Paper takes over Rock with probability  $\sigma_P$ :  $R_x + P_y \xrightarrow{\sigma_P} P_x + P_y$ , and Scissor takes over Paper with probability  $\sigma_S$ :  $P_x + S_y \xrightarrow{\sigma_S} S_x + S_y$ .

(A) In a fully symmetric scenario, where the replacement rates of the three pairs ( $\sigma_R = \sigma_P = \sigma_S = 1$ ) and the individual mortality rates ( $m_R = m_P = m_S = 0.4$ ) are equal, the three strains coexist for long times in a dynamic equilibrium. (B,C) Equal mortality rates ( $m_R = m_P = m_S = 0.4$ ) combined with asymmetric interaction rates permit the survival of only one species. In (B) the interaction rates span three orders of magnitude ( $\sigma_R = 0.1$ ,  $\sigma_P = 0.01$ ,  $\sigma_S = 0.9$ ) and thus are strongly asymmetric leading to a quick eradication of P (green) and eventual dominance of R (red). In (C) the interaction rates are only moderately different ( $\sigma_P = \sigma_R = 0.1$  and  $\sigma_S = 0.6$ ) and still only a single species prevails. (D) When one species has a slightly increased mortality rate ( $m_R = m_P = 0.4$ ,  $m_S = 0.44$ ) and the interaction rates are close to symmetric ( $\sigma_P = \sigma_R = 0.1$  and  $\sigma_S = 0.2$ ) also eventually only one species dominates.
